# Supplementary material for: Profiling Gut Microbiota and Bile Acid Metabolism in Critically ill Children
Source: Research Square preprint supplement (doi:10.21203/rs.3.rs-1111591/v1), 2021-12-03
Supplement: Supplementary file 1 [file 8086f1555f5bd4d03d8982ac.csv]

Master_sort	Sample_ID	DayspostPICU	Patient_0no1yes	age_months	Primary_Organ_failure	Sepsis_nonsepsis	Resp_nonresp	Neuro_nonneuro	DaysfreePICU30d	ventilation__hours	DayspostPICU	Survival	3a.Hydroxy.6,7.DiketoCholanic_Acid	Taurohyocholic_Acid	Glycoursodeoxycholic_Acid	3_Dehydrocholic_Acid	3,12.Diketocholanic_Acid	Ursodeoxycholic_acid	12_Dehydrocholic_Acid	Glycochenodeoxycholic_Acid	3a.Hydroxy.12_Ketolithocholic_Acid	Isolithocholic_Acid	Chenodeoxycholic_Acid	5ß.Cholanic_Acid.3ß,_12a.diol	3.Ketocholanic_Acid	Lithocholic_acid	Deoxycholic_Acid	Cholic_acid	23.nor.5b.Cholanic_Acid.3a,_12a.diol	3a.Hydroxy.12_Ketolithocholic_Acid	Taurocholic_Acid	weight_kg	Sample_num	GHICI_num	Sample_name	group_patient	first_sample	day_sample	DateRange	Sex_#	age_months	age_6m_group	age_year_group	primary_diagnosis	diagnosis_group1	diagnosis_group2	PICU_outcome	ventilation_hours	PICU_free_days
1	P005	8	1	101	Trauma/surgical						8	Alive																				18	005_day_8	005	101	patient	first_sample	8	d5-10	F	101	36m_191m	36m_191m	post_endo	Surgery	non_lung	Alive	192	0
2	P010	2	1	49	Sepsis							Alive																				15.2	010_day_2	010	7	patient	first_sample	2	d1-4	M	49	36m_191m	36m_191m	flu	Infection	lung	Alive	96	25
3	P012	3	1	136	Respiratory							Alive																					012_day_3	012	5	patient	first_sample	3	d1-4	F	136	36m_191m	36m_191m	asthma	Respiratory	lung	Alive	96	25
4	P013	1	1	15	Sepsis							Alive																					013_day_1	013	14	patient	first_sample	1	d1-4	M	15	12m_36m	12m_24m	croup	resp_infection	lung	Alive	48	28
5	P014	1	1	181	Respiratory							Died																					014_day_1	014	3	patient	first_sample	1	d1-4	F	181	36m_191m	36m_191m	resp_fail	Respiratory	lung	died	432	0
6	P015	8	1	51.6	Respiratory	1	1	0	19	504	9	Alive	3.21E+05	5.39E+05	2.89E+05	2.20E+06	7.43E+07	3.73E+06	5.19E+06	2.01E+06	3.08E+07	1.55E+06	4.05E+06	1.63E+05	8.88E+06	3.97E+06	2.18E+07	1.59E+06	2.85E+04	1.14E+05	1.93E+06	15	015_day_8	015	9	patient	first_sample	8	d5-10	F	51	36m_191m	36m_191m	pneumo	resp_infection	lung	Alive	216	19
7	P016	2	1	17	Sepsis	1	0	0				Alive																				10.7	016_day_2	016	8	patient	first_sample	2	d1-4	M	17	12m_36m	12m_24m	chick_pox	Infection	non_lung	Alive	48	27
8	P018	8	1	26.4	Sepsis	1	0	0	16	552	9	Alive																				12	018_day_8	018	2	patient	first_sample	8	d5-10	F	25	12m_36m	24m_36m	sepsis	Infection	non_lung	Alive	168	16
9	P021	3	1	13.2	Neurological	1	0	1	19	480	3	Alive	6.16E+05	3.47E+06	1.30E+05	2.81E+06	1.23E+06	7.93E+06	4.85E+07	7.09E+05	4.56E+06	2.18E+05	5.77E+06	2.00E+05	2.84E+05	7.87E+05	1.33E+08	9.24E+07	4.61E+03	1.17E+05	4.31E+06	8.8	021_day_3	021	72	patient	first_sample	3	d1-4	F	12	6m_12m	0m_12m	men	Infection	non_lung	Alive	240	19
10	P021	8	1	13.2	repeat_entry	1	0	1	19	480	8	repeat_entry	4.54E+04	8.87E+07	2.56E+06	9.57E+04	2.20E+05	1.02E+05	5.05E+05	3.01E+08	7.64E+04	1.15E+04	7.91E+05	5.17E+03	5.92E+04	4.82E+04	2.08E+05	6.90E+06	4.95E+01	1.37E+01	2.02E+08	8.8
11	P024	8	1	26.4	Respiratory	0	1	0	11	432	8	Alive																				15	024_day_8	024	103	patient	first_sample	8	d5-10	M	26	12m_36m	24m_36m	resp_fail	Respiratory	lung	Alive	288	11
12	P025	8	1	170.4	Trauma/surgical	1	1	0	0	0	8	Died	2.20E+05	2.78E+06	5.78E+04	1.69E+06	2.86E+06	6.18E+06	1.19E+07	6.53E+05	8.03E+06	4.51E+06	3.82E+06	4.01E+05	2.37E+06	2.96E+07	2.66E+08	1.09E+07	4.03E+04	1.44E+05	6.88E+06	37.5
13	P027	3	1	98.4	Respiratory	0	1	0	23	600	3	Alive																				32	027_day_2	027	120	patient	first_sample	2	d1-4	M	97	36m_191m	36m_191m	resp_fail	Respiratory	lung	Alive	120	23
14	P030	10	1	202.8	Respiratory	1	1	0	0	0	10	Died	3.11E+05	6.65E+05	1.29E+05	1.27E+06	2.88E+06	5.17E+06	2.06E+07	8.25E+05	1.23E+07	4.81E+05	3.17E+06	2.04E+05	6.88E+05	2.27E+06	1.14E+08	4.05E+07	3.16E+04	1.49E+05	1.60E+06	24
15	P034	4	1	19.66027397	Trauma/surgical	0	0	1	28	696		Alive	2.08E+05	5.42E+05	1.09E+05	1.28E+06	1.70E+06	4.81E+06	7.08E+06	4.71E+05	1.06E+07	8.06E+04	3.60E+06	2.09E+05	1.45E+05	3.23E+05	9.56E+07	2.07E+07	3.79E+04	1.44E+05	2.52E+06	12	034_day_3	034	74	patient	first_sample	3	d1-4	F	19	12m_36m	12m_24m	head_injury	Neuro	non_lung	Alive	24	28
16	P038	3	1	132	Respiratory	1	1	0	0	507	3	Alive																				44	038_day_3	038a	100	patient	first_sample	3	d1-4	M	131	36m_191m	36m_191m	resp_fail	Respiratory	lung	Alive	8	22
17	P038	8	1	132	repeat_entry	1	1	0	0	507	8	Alive																				44	038_day_8	038b	105	patient	second_sample	8	d5-10	M	131	36m_191m	36m_191m	resp_fail	Respiratory	lung	Alive	8	22
18	P053	7	1	76.8	Sepsis	1	0	0	28	689		repeat_entry	2.44E+04	5.49E+05	5.79E+03	1.26E+05	1.98E+05	5.83E+05	1.49E+06	1.53E+05	5.81E+04	1.74E+03	1.12E+06	2.62E+03	5.88E+05	1.54E+04	5.68E+05	2.32E+06	0.00E+00	1.99E+01	9.16E+05	20
19	P054	7	1	28.8	Respiratory	0	1	0	23	627		Alive	1.61E+05	9.33E+05	2.18E+05	1.62E+06	6.05E+05	1.01E+07	6.10E+06	1.26E+06	1.16E+06	4.44E+04	3.57E+07	6.20E+04	1.92E+05	6.98E+05	5.08E+07	5.73E+07	1.71E+04	1.35E+04	2.33E+06	13
20	P055	2	1	15.6	Sepsis	1	0	1	27	706	2	Alive	1.30E+06	1.00E+06	2.98E+05	1.02E+07	1.82E+07	8.26E+07	6.43E+07	1.72E+06	9.32E+05	4.08E+04	3.94E+07	2.77E+04	5.45E+05	2.10E+05	1.51E+06	1.58E+08	1.91E+03	2.60E+01	5.83E+06	10.9	055_day_2	055	22	patient	first_sample	2	d1-4	M	15	12m_36m	12m_24m	men	Infection	non_lung	Alive	14	27
21	P056	3	1	42	Trauma/surgical	1	0	0	25	661	3	Alive	7.34E+05	1.12E+06	3.67E+05	1.39E+07	1.68E+06	2.25E+06	2.17E+07	1.38E+06	1.03E+06	5.79E+05	8.63E+06	1.31E+04	2.53E+06	7.93E+06	4.28E+06	2.44E+08	1.04E+01	1.43E+01	4.70E+06	14.2
22	P058	8	1	31.2	Neurological	0	0	1	21	674		Alive	2.17E+05	3.38E+06	3.75E+05	1.85E+06	4.79E+05	1.50E+06	1.32E+07	2.60E+06	9.42E+05	4.12E+03	1.27E+07	1.45E+04	1.85E+05	3.38E+04	6.67E+06	2.00E+08	1.48E+03	2.49E+01	1.88E+07	14	058_day_8	058	17	patient	first_sample	8	d5-10	M	31	12m_36m	12m_24m	adem	Neuro	non_lung	Alive	46	21
23	P062	2	1	21.6	Respiratory	0	1	0	24	661	2	Alive	1.68E+06	5.31E+06	1.71E+05	6.59E+06	1.11E+06	1.86E+07	2.51E+08	5.49E+05	1.13E+07	8.52E+04	7.41E+06	2.60E+05	4.79E+05	1.22E+06	2.89E+08	3.99E+08	7.54E+02	1.50E+05	1.49E+07	14
24	P066	5	1	192	Neurological	0	0	1	24	653	2	Alive	6.00E+05	6.47E+05	2.57E+05	1.90E+06	7.42E+06	4.00E+06	1.51E+07	7.91E+05	1.95E+07	1.17E+05	2.81E+06	1.28E+05	1.54E+05	4.76E+05	4.08E+07	5.68E+06	8.48E+04	1.50E+05	3.58E+06	41	066_day_5	066	42	patient	first_sample	5	d5-10	F	191	36m_191m	36m_191m	seiz	Neuro	non_lung	Alive	67	24
25	P068	9	1	15.6	Sepsis	1	0	0	17	524	8	Alive																				8.2	068_day_9	068	48	patient	first_sample	9	d5-10	F	15	12m_36m	12m_24m	nec_fas	Infection	non_lung	Alive	196	17
26	P069	5	1	18	Sepsis	1	0	1	23	636	4	Alive	1.03E+06	7.07E+05	2.12E+05	8.08E+06	1.06E+07	4.36E+07	4.00E+07	1.09E+06	9.29E+07	1.86E+05	2.61E+07	5.48E+05	4.69E+05	2.39E+06	2.68E+08	1.16E+08	4.98E+04	3.16E+05	3.15E+06	12	069_day_5	069	47	patient	first_sample	5	d5-10	F	18	12m_36m	12m_24m	men	Infection	non_lung	Alive	84	23
27	P070	4	1	34.8	Respiratory	1	1	0	17	587	7	Alive	4.04E+05	3.37E+06	6.16E+04	6.56E+06	5.13E+05	1.88E+06	9.31E+07	9.23E+05	5.49E+05	2.61E+03	8.01E+07	1.13E+04	1.60E+05	8.31E+03	9.10E+06	8.80E+08	5.59E+01	3.25E+02	3.82E+06	18.9	070_day_4	070	49	patient	first_sample	4	d1-4	M	35	12m_36m	12m_24m	resp_fail	resp_infection	lung	Alive	133	17
28	P071	3	1	15.6	Respiratory	1	1	0	18	496	3	Alive	4.34E+04	1.76E+06	4.98E+04	4.53E+06	3.46E+05	3.63E+06	2.52E+06	1.14E+06	8.46E+05	9.03E+04	2.36E+08	1.23E+04	1.04E+06	6.95E+05	7.38E+07	7.59E+08	2.89E+03	0.00E+00	9.25E+06	12.34
29	P072	7	1	25.2	Respiratory	0	1	0	21	672		Alive	1.02E+05	1.52E+06	1.70E+05	6.16E+05	5.94E+05	1.48E+06	2.57E+06	7.49E+05	1.30E+06	7.84E+04	4.90E+05	7.26E+04	6.88E+05	9.47E+05	2.93E+07	1.43E+06	1.78E+03	3.23E+04	5.06E+06	12.7
30	P073	2	1	172.8	Sepsis	1	0	0	15	630	2	Alive	2.62E+05	5.61E+05	6.78E+04	2.99E+06	6.46E+05	3.13E+05	2.09E+07	1.18E+05	2.50E+04	2.88E+03	3.19E+05	2.10E+03	2.23E+05	9.14E+03	1.44E+05	1.09E+07	0.00E+00	1.27E+01	1.19E+06	29.9
31	P073	7	1	172.8	repeat_entry	1	0	0	15	630		repeat_entry	6.36E+02	5.15E+06	7.15E+04	2.35E+05	3.15E+04	1.21E+06	2.18E+05	3.39E+05	2.15E+04	7.49E+02	1.54E+07	1.50E+03	2.85E+05	3.34E+03	1.39E+06	6.92E+07	0.00E+00	7.61E-01	1.03E+07	29.9
32	P079	1	1	70	Neurological	0	0	1				Alive																					079_day_1	079	66	patient	first_sample	1	d1-4	M	70	36m_191m	36m_191m	resp_fail	Neuro	non_lung	Alive	12	0
33	P080	2	1	132	Neurological	1	0	1	24	632	2	Alive																				40	080_day_3	080a	65	patient	second_sample	3	d1-4	F	132	36m_191m	36m_191m	seiz	Neuro	non_lung	Alive	88	24
34	P080	1	1	132	repeat_entry	1	0	1	24	632	1	Alive																				40	080_day_1	080b	69	patient	first_sample	1	d1-4	F	132	36m_191m	36m_191m	seiz	Neuro	non_lung	Alive	88	24
35	P081	2	1	36	Sepsis	1	0	0	25	640	2	Alive																				14	081_day_2	081	68	patient	first_sample	2	d1-4	F	35	12m_36m	24m_36m	chick_pox	Infection	non_lung	Alive	80	25
36	P082	4	1	29	Neurological							Alive																				14	082_day_4	082	67	patient	first_sample	4	d1-4	F	29	12m_36m	24m_36m	adem	Neuro	non_lung	Alive	46	24
37	P088	7	1	18	Neurological	0	0	1	13	576	7	Alive	1.98E+06	1.12E+06	3.42E+05	1.32E+07	1.87E+06	5.56E+06	1.30E+08	1.74E+06	1.10E+05	4.51E+04	6.11E+07	2.73E+04	2.71E+05	7.59E+04	8.51E+05	5.78E+08	9.03E+02	7.80E+01	3.05E+07	10
38	P089	3	1	24	Respiratory	0	1	0	20	559	3	Alive	7.19E+05	6.56E+05	5.50E+05	9.55E+06	3.56E+06	1.87E+07	8.73E+07	2.53E+06	2.53E+06	1.12E+05	5.79E+07	5.86E+04	4.78E+05	8.36E+05	5.08E+07	2.77E+08	6.15E+03	9.20E+03	4.98E+06	15.9
39	P089	7	1	24	repeat_entry	0	1	0	20	559	7	repeat_entry	3.77E+04	1.16E+06	1.60E+07	4.58E+05	1.36E+05	5.83E+05	1.12E+06	2.29E+08	3.23E+04	6.93E+03	1.66E+07	1.03E+04	2.07E+05	2.24E+04	5.57E+06	1.90E+08	1.63E+02	8.55E+00	1.38E+08	15.9
40	P094	2	1	36	Neurological	1	0	1	28	698		Alive	1.51E+06	5.38E+05	6.14E+04	3.72E+06	4.18E+06	1.03E+07	9.30E+07	3.34E+05	5.94E+06	5.19E+03	1.14E+07	4.31E+04	1.42E+05	1.21E+05	6.07E+07	3.38E+07	8.59E+03	2.60E+04	1.61E+06	12	094_day_2	094a	87	patient	first_sample	2	d1-4	M	23	12m_36m	12m_24m	men	Infection	non_lung	Alive	22	28
41	P094	7	1	36	repeat_entry	1	0	1	28	698	7	repeat_entry	9.08E+04	1.38E+07	1.33E+07	7.15E+04	5.83E+04	1.52E+05	4.77E+05	1.90E+08	5.09E+04	1.18E+03	1.85E+06	2.46E+03	2.25E+04	1.42E+04	9.36E+05	5.43E+06	0.00E+00	2.82E+01	2.25E+08	12	094_day_7	094b	88	patient	second_sample	7	d5-10	M	23	12m_36m	12m_24m	men	Infection	non_lung	Alive	22	28
42	P095	7	1	15.78082192	Respiratory	0	1	0	17	432		Alive	3.27E+04	1.16E+05	4.33E+04	6.24E+05	8.40E+05	5.02E+06	1.01E+06	6.33E+05	5.95E+06	4.11E+06	3.25E+06	1.12E+05	1.57E+06	2.68E+07	5.60E+07	5.40E+06	6.15E+03	6.83E+04	9.63E+05	11.05	095_day_7	095	89	patient	first_sample	7	d5-10	M	15	12m_36m	12m_24m	ingest_caustic	Respiratory	lung	Alive	446	17
43	P096	6	1	93	Sepsis	1	1	0	18	720	10	Alive																				24	096_day_6	096	90	patient	first_sample	6	d5-10	F	93	36m_191m	36m_191m	resp_fail	resp_infection	lung	Alive	542	18
44	P096	10	1	93.6	repeat_entry	1	1	0	18	720	1	repeat_entry	5.32E+04	7.34E+05	2.30E+04	3.46E+05	4.69E+05	1.79E+06	2.78E+06	2.89E+05	1.56E+06	1.91E+05	1.30E+06	8.19E+04	3.28E+05	8.41E+05	6.47E+07	4.01E+06	1.64E+00	2.91E+04	0.00E+00	24
45	P097	3	1	146.4	Respiratory	1	1	0	22	647		Alive	4.64E+06	1.63E+06	4.02E+05	4.63E+06	1.06E+06	1.29E+07	2.25E+08	3.50E+06	4.46E+05	1.41E+04	6.34E+06	1.17E+04	1.73E+05	4.30E+04	7.81E+05	2.41E+08	3.82E+02	2.73E+00	9.27E+06	35.5
46	P099	4	1	30	Respiratory	0	0	1	22	630	1	Alive																				13.5	099_day_4	099	97	patient	first_sample	4	d1-4	F	29	12m_36m	24m_36m	pneumo	Infection	lung	Alive	90	22
47	P103	3	1	12	Respiratory	0	0	1	26	679	2	Alive																				9.1	103_day_3	103	123	patient	first_sample	3	d1-4	M	12	12m_36m	0m_12m	pneumo	resp_infection	lung	Alive	106	23
48	P104	1	1	54	Neurological	1	0	0	16	650	3	Alive	1.61E+05	4.41E+05	1.09E+05	8.68E+05	7.44E+05	2.99E+06	5.39E+06	5.81E+05	1.58E+06	7.62E+04	4.40E+06	4.16E+04	1.80E+05	1.12E+06	2.47E+07	1.19E+07	2.43E+03	5.64E+03	2.01E+06	16	104_day_1	104	129	patient	first_sample	1	d1-4	F	54	36m_191m	36m_191m	encephal	Neuro	non_lung	Alive	41	26
49	P106	4	1	67.2	Trauma/surgical	1	0	0	16	650	10	Alive																				24	106_day_4	106a	169	patient	first_sample	4	d1-4	F	67	36m_191m	36m_191m	gut_surgery	Surgery	non_lung	Alive	70	16
50	P106	8	1	67	repeat_entry							repeat_entry																				24	106_day_8	106b	171	patient	second_sample	8	d5-10	F	67	36m_191m	36m_191m	gut_surgery	Surgery	non_lung	Alive	70	16
51	P106	10	1	67.2	repeat_entry	0	1	0	27	694	1	repeat_entry																					106_day_10	106c	172	patient	third_sample	10	d5-10	F	67	36m_191m	36m_191m	gut_surgery	Surgery	non_lung	Alive	70	16
52	P109	9	1	127.2	Neurological	1	0	1	24	626	1	Alive																				41.3	109_day_9	109	181	patient	first_sample	9	d5-10	F	126	36m_191m	36m_191m	brain_tumour	Surgery	non_lung	Alive	0	unknown
53	P111	7	1	153	Sepsis							Alive																				59.4	111_day_7	111	158	patient	first_sample	7	d5-10	F	153	36m_191m	36m_191m	men	Infection	non_lung	Alive	69	24
54	P116	5	1	51.6	Sepsis	1	0	1	24	627	4	Alive	6.95E+04	3.58E+05	2.21E+05	2.02E+06	2.87E+05	2.66E+06	7.47E+06	2.69E+06	3.72E+05	2.36E+04	7.54E+07	8.50E+03	5.17E+05	1.88E+05	2.39E+07	2.93E+08	1.09E+02	4.28E+01	5.16E+06	16	116_day_5	116	143	patient	first_sample	5	d5-10	F	51	36m_191m	36m_191m	men	Infection	non_lung	Alive	93	24
55	P118	2	1	68.4	Sepsis				25	644		Alive																				18	118_day_2	118	179	patient	first_sample	2	d1-4	M	68	36m_191m	36m_191m	chick_pox	Infection	non_lung	Alive	76	24
56	P119	4	1	56.38356164	Sepsis	0	0	1	26	656	1	Alive																				20	119_day_4	119	154	patient	first_sample	4	d1-4	M	56	36m_191m	36m_191m	tracheitis	resp_infection	lung	Alive	76	25
57	P120	3	1	79.2	Neurological	0	0	1	26	656	3	Alive	4.82E+05	5.87E+05	4.36E+05	2.28E+07	1.86E+06	2.10E+07	4.65E+07	8.33E+05	4.08E+06	9.71E+04	1.44E+07	1.06E+05	7.06E+05	7.17E+05	6.61E+07	3.76E+08	4.91E+02	5.67E+04	7.24E+06	37	120_day_3	120a	164	patient	first_sample	3	d1-4	F	79	36m_191m	36m_191m	intracran_hypoten	Neuro	non_lung	Alive	64	26
58	P120	4	1	79.2	repeat_entry	1	0	1	22	645	2	repeat_entry																				37	120_day_4	120b	183	patient	second_sample	4	d1-4	F	79	36m_191m	36m_191m	intracran_hypoten	Neuro	non_lung	Alive	64	26
59	P124	2	1	171.6	Neurological	1	0	0	25	624	0	Alive	1.03E+00	2.76E+07	6.63E+06	2.13E+04	8.32E+04	4.04E+04	7.43E+04	1.02E+08	2.37E+04	1.18E+03	2.14E+05	4.32E+03	1.64E+05	3.68E+04	2.93E+05	8.57E+05	3.53E+03	4.19E+01	2.60E+08	37
60	P134	9	1	36	Trauma/surgical							Alive																				15.7	134_day_9	134	202	patient	first_sample	9	d5-10	M	36	36m_191m	36m_191m	post_tracheo	Surgery	non_lung	Alive	191	20
61	P135	5	1	143	Respiratory							Alive																				28.3	135_day_5	135a	199	patient	second_sample	5	d5-10	F	143	36m_191m	36m_191m	resp_fail	Respiratory	lung	Alive	83	24
62	P135	4	1	143	repeat_entry							repeat_entry																				28.3	135_day_4	135b	203	patient	first_sample	4	d1-4	F	143	36m_191m	36m_191m	resp_fail	Respiratory	lung	Alive	83	24
63	P136	3	1	42	Sepsis							Alive																				9.3	136_day_3	136	198	patient	first_sample	3	d1-4	F	42	36m_191m	36m_191m	bronch	resp_infection	lung	Alive	61	24
64	P139	4	1	40	Sepsis							Alive																				20	139_day_4	139	204	patient	first_sample	4	d1-4	M	40	36m_191m	36m_191m	anaphylaxis	resp_infection	lung	Alive	209	20
65	P142	3	1	129	Sepsis							Alive																				27.8	142_day_3	142	205	patient	first_sample	3	d1-4	M	129	36m_191m	36m_191m	bronch	resp_infection	lung	Alive	248	18
66	P144	5	1	13	Sepsis							Alive																				8.9	144_day_5	144a	206	patient	first_sample	5	d5-10	F	13	12m_36m	12m_24m	bronch	resp_infection	lung	Alive	94	25
67	P144	6	1	13	repeat_entry							repeat_entry																				8.9	144_day_6	144b	207	patient	second_sample	6	d5-10	F	13	12m_36m	12m_24m	bronch	resp_infection	lung	Alive	94	25
68	PBAS1001	2	1	73	Sepsis	0	1	0	25	624	0	Alive	1.03E+00	2.76E+07	6.63E+06	2.13E+04	8.32E+04	4.04E+04	7.43E+04	1.02E+08	2.37E+04	1.18E+03	2.14E+05	4.32E+03	1.64E+05	3.68E+04	2.93E+05	8.57E+05	3.53E+03	4.19E+01	2.60E+08	17.6
69	PBAS1003	2	1	14	Respiratory	1	0	0	21	600	0	Alive	2.32E+05	3.12E+07	9.01E+04	1.75E+07	8.10E+05	3.07E+06	2.63E+07	9.83E+05	7.26E+05	3.21E+03	1.94E+08	1.60E+04	5.06E+05	2.42E+04	4.32E+07	7.41E+08	8.71E+01	2.86E+02	1.19E+08	7.8
70	PBAS1014	1	1	46	Sepsis							Alive	9.92E+04	1.24E+07	1.08E+07	2.02E+05	1.18E+05	7.11E+05	1.19E+07	5.95E+08	6.85E+05	1.18E+03	3.38E+07	8.06E+03	6.89E+04	6.52E+03	1.09E+07	1.29E+08	5.83E+01	3.18E+01	5.00E+08	10.5
71	PBAS1020	1	1	136.4054795	Sepsis				27	720	0	Alive	6.03E+03	4.04E+06	8.76E+06	6.49E+04	4.89E+04	7.41E+04	2.01E+05	2.45E+08	9.84E+03	9.61E+02	1.18E+06	2.66E+03	3.67E+04	3.86E+03	2.66E+05	1.67E+06	0.00E+00	1.74E+01	2.18E+08
72	PBAS1023	1	1	126	Neurological	0	0	1	26	672	0	Alive	1.99E+04	8.58E+04	3.22E+00	5.77E+05	1.34E+05	6.57E+05	3.67E+06	1.82E+05	2.51E+05	6.82E+05	3.55E+06	1.53E+04	5.78E+05	2.03E+06	1.11E+07	2.65E+07	0.00E+00	7.09E+01	4.89E+05	15
73	PBAS1062	1	1	30	Sepsis				18	576	0	Alive	4.57E+05	3.41E+05	7.66E+04	3.72E+06	9.09E+05	5.83E+06	2.52E+07	4.86E+05	5.14E+06	1.86E+05	1.12E+07	9.60E+04	2.42E+05	1.27E+06	5.47E+07	1.41E+08	1.25E+04	3.23E+04	2.92E+06	13
74	PBAS1084	4	1	136.4054795	Sepsis	1	0	0	20	576	0.178472222	Alive	2.37E+05	4.12E+05	7.41E+04	1.43E+06	2.96E+05	1.45E+06	4.78E+07	5.20E+05	5.49E+05	1.51E+04	1.54E+07	8.86E+03	3.33E+05	1.04E+05	7.71E+06	1.40E+08	0.00E+00	1.04E+00	4.90E+06
75	PBAS1103	1	1	37	Sepsis	1	0	0	16	480	-0.106944444	Alive	8.29E+03	8.90E+06	2.49E+05	2.35E+04	3.74E+04	5.39E+04	1.98E+05	1.08E+08	2.61E+04	1.16E+03	2.09E+06	2.26E+03	3.15E+04	7.57E+03	6.21E+05	5.38E+06	0.00E+00	3.58E+01	4.30E+08	17.6
76	PBAS1277	4	1	59	Neurological	1	0	0	26	672	0	Alive	5.69E+05	1.24E+06	2.65E+05	1.03E+07	1.17E+06	6.35E+07	1.12E+08	9.10E+05	5.69E+05	1.51E+04	4.22E+07	2.58E+04	2.32E+05	4.00E+04	6.77E+06	8.30E+08	1.23E+03	1.44E+02	1.67E+07		BAS1277_day_4	BAS1277	162	patient	first_sample	4	d1-4	M	25	12m_36m	24m_36m	unknown	Neuro	non_lung	Alive	15	26
77	PBAS1356	4	1	25.28219178	Sepsis	1	1	0	13	360	-0.052083333	Alive	7.97E+01	2.24E+05	1.05E+05	9.11E+03	1.41E+04	6.83E+04	1.49E+05	1.69E+05	5.89E+03	1.29E+03	1.04E+06	2.40E+03	1.03E+04	8.68E+02	2.20E+05	1.30E+07	0.00E+00	4.95E+01	7.53E+05
78	PBAS1485	4	1	50	Sepsis	1	0	0	22	576	0	Alive	4.22E+03	1.63E+06	4.47E+05	2.46E+04	2.17E+05	5.98E+04	2.25E+05	1.53E+08	2.97E+05	1.10E+04	1.10E+06	1.02E+04	9.24E+04	7.59E+04	7.39E+05	1.49E+06	0.00E+00	3.41E+01	2.38E+07	12.8
79	PBAS1563	2	1	12	Respiratory	0	1	0	26	648	0	Alive	1.47E+06	8.72E+05	1.47E+05	2.38E+06	5.70E+07	9.57E+06	1.03E+07	1.51E+06	7.16E+07	5.90E+05	3.72E+06	3.25E+05	2.30E+06	6.41E+06	2.36E+07	4.43E+06	6.68E+03	2.28E+05	3.76E+06	7.8
80	PBAS1564	2	1	24	Respiratory	1	1	0	23	600	0.052083333	Alive	6.67E+03	3.53E+07	5.41E+05	2.98E+04	6.16E+04	2.88E+04	2.10E+05	3.91E+08	2.72E+04	6.79E+02	2.84E+05	3.35E+03	6.16E+03	1.11E+04	1.17E+05	1.09E+07	1.62E+01	2.51E+01	4.46E+08	14.3
81	C020	Control	0	120	Control				30	720		Control	6.48E+04	2.07E+05	1.75E+05	6.36E+05	2.46E+06	1.29E+07	1.44E+06	7.12E+05	1.45E+07	8.50E+05	7.05E+07	2.02E+05	6.85E+05	7.46E+06	1.62E+08	3.41E+06	1.40E+04	1.90E+05	1.01E+06	33	C020_day_1	C020	46	control	control	0	control	F	119	36m_191m	36m_191m	control	control	control	control	-1	-1
82	C025	Control	0	62	Control				30	720		Control	1.47E+05	4.08E+05	1.22E+05	1.14E+06	7.30E+06	3.85E+06	5.68E+06	7.49E+05	1.81E+07	1.72E+06	1.88E+06	1.33E+05	3.18E+06	9.46E+06	7.03E+07	1.20E+06	7.40E+04	1.44E+05	2.58E+06	18.5	C025_day_1	C025	45	control	control	-1	control	F	61	36m_191m	36m_191m	control	control	control	control	-1	-1
83	C026	Control	0	37	Control				30	720		Control	1.94E+05	7.06E+05	1.90E+05	7.46E+05	6.88E+06	2.97E+06	3.86E+06	1.41E+06	3.21E+06	1.13E+06	2.55E+06	3.85E+04	5.20E+06	5.18E+06	4.21E+06	3.28E+06	1.01E+04	9.28E+03	3.30E+06	19
84	C027	Control	0	54	Control				30	720		Control	5.04E+05	9.54E+05	2.81E+05	2.28E+06	6.32E+06	4.67E+06	6.96E+06	2.04E+06	5.02E+06	6.91E+05	3.09E+06	1.20E+05	1.85E+06	4.54E+06	1.51E+07	2.70E+06	3.35E+04	2.54E+04	4.55E+06	23.2	C027_day_1	C027	44	control	control	0	control	M	54	36m_191m	36m_191m	control	control	control	control	-1	-1
85	C029	Control	0	144	Control				30	720		Control	7.88E+05	8.35E+05	2.37E+05	2.02E+06	2.61E+07	6.00E+07	2.94E+07	1.24E+06	7.94E+07	3.11E+06	2.34E+07	5.14E+05	3.93E+06	2.27E+07	1.98E+08	2.50E+07	5.98E+03	2.88E+05	3.11E+06
86	C030	Control	0	42	Control				30	720		Control	4.34E+05	1.21E+06	4.97E+05	2.63E+06	4.31E+07	8.06E+06	6.95E+06	2.12E+06	5.57E+07	8.65E+06	4.54E+06	3.98E+05	2.27E+07	3.00E+07	6.48E+07	2.13E+06	3.90E+04	1.03E+05	4.41E+06	50
87	C033	Control	0	62	Control				30	720		Control	2.28E+05	4.81E+05	2.25E+05	1.55E+06	1.97E+07	8.99E+06	3.68E+06	1.65E+06	3.10E+07	1.19E+07	4.29E+06	2.52E+05	2.46E+07	4.65E+07	1.19E+08	2.25E+06	1.15E+05	1.28E+05	2.50E+06	27
88	C040	Control	0	79	Control				30	720		Control	1.54E+05	4.39E+05	1.25E+05	6.68E+05	3.69E+06	1.97E+06	1.60E+06	1.54E+06	5.84E+06	3.96E+05	1.34E+06	4.97E+04	1.21E+06	3.01E+06	1.12E+07	2.12E+06	3.24E+03	3.24E+04	4.18E+06	22
89	C043	Control	0	40	Control				30	720		Control	4.41E+05	3.94E+05	1.96E+05	9.54E+05	3.04E+06	3.50E+06	5.67E+06	1.16E+06	3.76E+06	1.82E+05	2.48E+06	5.44E+04	3.60E+05	1.00E+06	9.17E+06	4.96E+06	1.53E+03	1.57E+04	4.06E+06	15
90	C050	Control	0	28	Control				30	720		Control	1.60E+05	3.42E+05	1.19E+05	8.10E+05	1.97E+07	3.39E+06	3.28E+06	9.29E+05	1.60E+07	1.69E+06	3.11E+06	8.90E+04	6.71E+06	6.57E+06	1.67E+07	3.26E+06	3.12E+02	9.47E+04	3.85E+06	12.7	C050_day_1	C050	137	control	control	-1	control	F	27	12m_36m	24m_36m	control	control	control	control	-1	-1
91	C057	Control	0	53	Control				30	720		Control	2.59E+05	5.39E+05	2.03E+05	1.44E+06	1.27E+07	5.36E+06	4.52E+06	9.87E+05	4.81E+07	2.36E+06	8.77E+06	3.36E+05	2.16E+06	1.24E+07	8.04E+07	2.54E+06	1.79E+05	1.34E+05	2.37E+06	19	C057_day_1	C057	130	control	control	0	control	M	53	36m_191m	36m_191m	control	control	control	control	-1	-1
92	C058	Control	0	35	Control				30	720		Control	5.56E+05	4.04E+05	1.95E+05	8.01E+05	1.25E+06	1.37E+06	2.81E+06	7.86E+05	1.31E+06	1.64E+05	1.85E+06	2.46E+04	2.39E+05	5.24E+05	3.64E+06	3.17E+06	1.16E+04	0.00E+00	2.11E+06
93	C061	Control	0	63	Control				30	720		Control	3.91E+05	5.98E+05	1.93E+05	1.20E+06	2.13E+06	7.22E+06	6.46E+06	8.01E+05	4.50E+06	1.39E+06	2.70E+06	3.58E+05	1.14E+06	4.42E+06	8.90E+07	2.80E+06	5.53E+04	1.06E+05	2.53E+06	18	C061_day_1	C061	128	control	control	-1	control	M	63	36m_191m	36m_191m	control	control	control	control	-1	-1
94	C062	Control	0	37	Control				30	720		Control	2.58E+05	6.15E+05	1.54E+05	1.02E+06	2.18E+06	2.59E+06	4.73E+06	9.04E+05	1.71E+06	1.00E+06	3.53E+06	6.24E+04	1.44E+06	3.25E+06	9.02E+06	4.59E+06	7.13E+03	2.38E+00	5.62E+06	14	C062_day_1	C062	134	control	control	0	control	M	37	36m_191m	36m_191m	control	control	control	control	-1	-1
95	C063	Control	0	91	Control				30	720		Control	4.34E+05	9.01E+05	4.36E+05	3.06E+06	6.95E+07	2.04E+07	1.01E+07	3.31E+06	2.16E+08	4.59E+06	5.47E+06	1.37E+06	3.35E+06	2.45E+07	2.83E+08	2.73E+06	7.59E+04	1.19E+06	5.48E+06	23	C063_day_1	C063	126	control	control	-1	control	F	90	36m_191m	36m_191m	control	control	control	control	-1	-1
96	C064	Control	0	73	Control				30	720		Control	3.46E+05	8.07E+05	2.16E+05	2.48E+06	1.67E+07	1.89E+07	7.15E+06	1.89E+06	7.30E+07	2.52E+06	3.90E+06	7.95E+05	1.81E+06	7.44E+06	2.46E+08	1.81E+06	8.39E+04	2.68E+05	4.08E+06	21	C064_day_1	C064	132	control	control	0	control	F	73	36m_191m	36m_191m	control	control	control	control	-1	-1
97	C065	Control	0	55	Control				30	720		Control	2.08E+05	3.77E+05	2.96E+05	9.44E+05	7.85E+06	3.15E+06	3.38E+06	1.28E+06	1.97E+07	2.97E+06	1.56E+06	1.69E+05	5.74E+06	2.08E+07	6.63E+07	2.37E+06	2.13E+04	1.28E+05	2.45E+06	16	C065_day_1	C065	131	control	control	-1	control	M	55	36m_191m	36m_191m	control	control	control	control	-1	-1
98	C066	Control	0	58	Control				30	720		Control	1.31E+05	2.88E+05	1.39E+05	7.19E+05	9.99E+05	1.72E+06	1.83E+06	8.62E+05	7.61E+05	2.91E+06	1.26E+06	9.06E+04	4.56E+06	6.68E+06	1.62E+06	6.87E+05	1.28E+04	9.11E+02	1.43E+06	20.4	C066_day_1	C066	133	control	control	0	control	M	57	36m_191m	36m_191m	control	control	control	control	-1	-1
99	C067	Control	0	141	Control				30	720		Control	2.33E+05	6.03E+05	3.01E+05	1.82E+06	4.49E+06	1.15E+07	4.37E+06	1.35E+06	1.56E+07	7.82E+06	4.23E+06	2.37E+05	9.69E+06	2.74E+07	1.51E+08	2.07E+06	8.30E+04	1.54E+05	2.51E+06	40.8	C067_day_1	C067	136	control	control	-1	control	F	141	36m_191m	36m_191m	control	control	control	control	-1	-1
100	C069	Control	0	24	Control				30	720		Control	3.38E+05	6.71E+05	1.95E+05	1.42E+06	7.36E+07	4.36E+06	6.77E+06	1.40E+06	3.87E+07	6.40E+06	3.55E+06	2.03E+05	3.81E+07	1.87E+07	1.62E+07	3.19E+06	1.52E+04	1.42E+05	3.94E+06	12.1	C069_day_1	C069	150	control	control	0	control	F	24	12m_36m	24m_36m	control	control	control	control	-1	-1
101	C070	Control	0	75	Control				30	720		Control	1.60E+05	8.46E+05	1.25E+05	5.44E+05	7.87E+06	1.47E+06	1.81E+06	7.21E+05	8.38E+05	7.26E+05	3.28E+06	1.80E+04	7.90E+06	3.49E+06	1.74E+06	2.57E+06	5.62E+03	3.38E+02	7.43E+06	18.9	C070_day_1	C070	156	control	control	-1	control	F	75	36m_191m	36m_191m	control	control	control	control	-1	-1
102	C071	Control	0	107.16	Control				30	720		Control																				29	C071_day_1	C071	177	control	control	0	control	M	107	36m_191m	36m_191m	control	control	control	control	-1	-1
103	C072	Control	0	87.36	Control				30	720		Control																				27.7	C072_day_1	C072	178	control	control	-1	control	M	87	36m_191m	36m_191m	control	control	control	control	-1	-1
104	C073	Control	0	51.48	Control				30	720		Control																				18.1	C073_day_1	C073	176	control	control	0	control	M	62	36m_191m	36m_191m	control	control	control	control	-1	-1
105	C074	Control	0	136	Control				30	720		Control																				35.6	C074_day_1	C074	190	control	control	-1	control	F	136	36m_191m	36m_191m	control	control	control	control	-1	-1
106	C075	Control	0	101	Control				30	720		Control																				27.3	C075_day_1	C075	191	control	control	0	control	F	101	36m_191m	36m_191m	control	control	control	control	-1	-1
107	C076	Control	0	64	Control				30	720		Control																				19.4	C076_day_1	C076	195	control	control	-1	control	M	64	36m_191m	36m_191m	control	control	control	control	-1	-1
108	C078	Control	0	39	Control				30	720		Control	5.06E+05	9.07E+05	5.36E+05	1.93E+06	1.55E+08	1.42E+07	5.95E+06	2.55E+06	1.16E+08	1.31E+07	1.16E+07	5.14E+05	4.93E+07	5.76E+07	1.04E+08	8.84E+06	1.02E+04	4.23E+05	4.19E+06	15	C078_day_1	C078	147	control	control	0	control	F	38	36m_191m	36m_191m	control	control	control	control	-1	-1
109	C079	Control	0	65	Control				30	720		Control	9.75E+05	6.79E+05	3.58E+05	4.28E+06	1.49E+07	3.10E+07	3.26E+07	1.69E+06	6.10E+07	4.49E+05	2.72E+07	4.70E+05	6.99E+05	4.15E+06	3.10E+08	6.58E+07	2.24E+04	2.69E+05	3.34E+06	21	C079_day_1	C079	145	control	control	-1	control	F	64	36m_191m	36m_191m	control	control	control	control	-1	-1
110	C080	Control	0	22	Control				30	720		Control	1.58E+06	9.82E+05	5.70E+05	4.55E+06	1.32E+08	4.62E+07	5.37E+07	2.90E+06	2.34E+08	5.98E+06	1.56E+07	1.79E+06	1.80E+07	4.44E+07	3.94E+08	3.12E+07	3.04E+04	7.54E+05	3.04E+06	11.8	C080_day_1	C080	166	control	control	0	control	M	21	12m_36m	12m_24m	control	control	control	control	-1	-1
111	C081	Control	0	46	Control				30	720		Control	4.99E+05	1.03E+06	2.43E+05	1.75E+06	1.97E+07	1.36E+07	1.74E+07	1.67E+06	4.95E+07	9.87E+06	4.32E+06	5.49E+05	1.27E+07	3.24E+07	1.95E+08	4.97E+06	6.19E+04	2.51E+05	3.26E+06	17.6	C081_day_1	C081	165	control	control	-1	control	M	45	36m_191m	36m_191m	control	control	control	control	-1	-1
112	C082	Control	0	61	Control				30	720		Control	2.25E+05	6.05E+05	1.87E+05	1.22E+06	2.62E+06	2.47E+06	4.12E+06	1.17E+06	4.79E+06	1.21E+06	2.39E+06	5.81E+04	1.64E+06	9.00E+06	1.94E+07	2.07E+06	2.90E+04	1.59E+04	3.57E+06	19.6	C082_day_1	C082	148	control	control	0	control	F	60	36m_191m	36m_191m	control	control	control	control	-1	-1
113	C083	Control	0	30	Control				30	720		Control																				13.6	C083_day_1	C083	146	control	control	-1	control	F	30	12m_36m	24m_36m	control	control	control	control	-1	-1
114	C084	Control	0	60	Control				30	720		Control	1.12E+05	3.74E+05	1.07E+05	4.43E+05	3.71E+05	7.49E+05	1.38E+06	5.39E+05	3.12E+05	9.02E+04	1.22E+06	1.29E+04	1.61E+05	4.89E+05	2.86E+06	2.88E+06	1.02E+03	1.59E+01	1.42E+06	21.3	C084_day_1	C084	142	control	control	0	control	F	59	36m_191m	36m_191m	control	control	control	control	-1	-1
115	C085	Control	0	42	Control				30	720		Control	2.17E+05	5.10E+05	2.70E+05	1.04E+06	3.30E+06	4.74E+06	4.64E+06	1.19E+06	1.18E+07	1.30E+06	2.31E+06	1.29E+05	1.17E+06	7.33E+06	4.99E+07	1.14E+06	6.59E+04	1.27E+05	3.27E+06		C085_day_1	C085	149	control	control	-1	control	F	42	36m_191m	36m_191m	control	control	control	control	-1	-1
116	C086	Control	0	81	Control				30	720		Control	1.66E+05	4.84E+05	1.36E+05	9.96E+05	8.11E+06	3.40E+06	2.99E+06	6.97E+05	1.40E+07	2.91E+06	2.40E+06	1.92E+05	5.70E+06	9.95E+06	4.72E+07	3.14E+06	2.83E+04	1.56E+05	1.67E+06		C086_day_1	C086	138	control	control	0	control	M	80	36m_191m	36m_191m	control	control	control	control	-1	-1
117	C089	Control	0	138	Control				30	720		Control																				42.62	C089_day_1	C089	141	control	control	-1	control	F	138	36m_191m	36m_191m	control	control	control	control	-1	-1
118	C090	Control	0	111	Control				30	720		Control	4.31E+05	9.40E+05	2.98E+05	2.56E+06	1.37E+08	3.69E+06	5.38E+06	1.91E+06	5.05E+07	9.33E+06	1.95E+06	2.34E+05	6.26E+07	1.66E+07	2.14E+07	1.14E+06	2.02E+04	1.84E+05	3.11E+06		C090_day_1	C090	155	control	control	0	control	M	110	36m_191m	36m_191m	control	control	control	control	-1	-1
119	C091	Control	0	63	Control				30	720		Control	4.34E+05	4.79E+05	2.37E+05	2.86E+06	1.16E+06	1.33E+07	2.91E+07	9.49E+05	2.33E+06	3.86E+04	1.03E+07	8.93E+04	1.27E+05	2.88E+05	4.69E+07	8.13E+07	2.81E+04	2.19E+04	2.35E+06		C091_day_1	C091	140	control	control	-1	control	F	61	36m_191m	36m_191m	control	control	control	control	-1	-1
120	C093	Control	0	58	Control				30	720		Control	2.02E+05	5.74E+05	2.48E+05	9.54E+05	4.77E+06	4.10E+06	4.22E+06	9.45E+05	2.94E+07	5.51E+04	2.30E+06	2.42E+05	2.23E+05	4.92E+05	1.36E+08	7.51E+06	2.77E+04	1.65E+05	2.26E+06	18.1	C093_day_1	C093	139	control	control	0	control	M	58	36m_191m	36m_191m	control	control	control	control	-1	-1
121	C094	Control	0	111	Control				30	720		Control																				34.02	C094_day_1	C094	170	control	control	-1	control	M	111	36m_191m	36m_191m	control	control	control	control	-1	-1
122	C100	Control	0	87	Control				30	720		Control	2.50E+05	6.15E+05	2.24E+05	1.45E+06	8.74E+06	8.79E+06	5.81E+06	1.55E+06	3.55E+07	5.09E+06	5.44E+06	3.75E+05	6.76E+06	3.39E+07	1.72E+08	2.52E+06	6.34E+04	1.18E+05	4.55E+06	23	C100_day_1	C100	92	control	control	0	control	M	87	36m_191m	36m_191m	control	control	control	control	-1	-1
123	C101	Control	0	59	Control				30	720		Control	1.63E+05	3.40E+05	9.25E+04	7.40E+05	3.02E+06	1.27E+06	1.92E+06	4.96E+05	4.35E+06	5.20E+05	1.43E+06	4.44E+04	1.18E+06	3.64E+06	2.10E+07	1.32E+06	1.15E+04	1.69E+04	1.47E+06	23	C101_day_1	C101	93	control	control	-1	control	F	58	36m_191m	36m_191m	control	control	control	control	-1	-1
124	C102	Control	0	73	Control				30	720		Control	3.79E+05	7.31E+05	2.68E+05	1.98E+06	2.57E+07	7.39E+06	5.45E+06	1.56E+06	6.96E+07	1.42E+06	3.53E+06	4.51E+05	1.68E+06	1.11E+07	1.47E+08	2.39E+06	1.92E+05	1.56E+05	3.15E+06	22.5	C102_day_1	C102	122	control	control	0	control	F	72	36m_191m	36m_191m	control	control	control	control	-1	-1
125	C103	Control	0	58	Control				30	720		Control	2.55E+05	6.06E+05	4.15E+05	1.78E+06	1.75E+07	1.27E+07	8.10E+06	1.33E+06	6.50E+07	2.14E+06	7.34E+06	7.86E+05	1.37E+06	8.86E+06	3.00E+08	1.30E+07	1.52E+05	2.13E+05	2.17E+06	20	C103_day_1	C103	95	control	control	-1	control	F	58	36m_191m	36m_191m	control	control	control	control	-1	-1
126	C104	Control	0	32	Control				30	720		Control	1.88E+05	5.11E+05	3.40E+05	1.40E+06	8.72E+06	8.09E+06	4.86E+06	1.22E+06	4.33E+07	8.54E+05	6.62E+06	4.60E+05	6.70E+05	5.28E+06	2.27E+08	5.26E+06	4.87E+04	1.58E+05	1.83E+06	19	C104_day_1	C104	96	control	control	0	control	F	39	36m_191m	36m_191m	control	control	control	control	-1	-1
127	C105	Control	0	12	Control				30	720		Control																				32
128	C106	Control	0	75	Control				30	720		Control	1.47E+05	4.13E+05	1.08E+05	5.12E+05	8.19E+05	1.12E+06	3.03E+06	4.49E+05	8.04E+05	1.03E+05	9.82E+05	1.34E+04	2.59E+05	8.11E+05	3.46E+06	7.52E+05	2.28E+03	0.00E+00	8.23E+06	69	C106_day_1	C106	94	control	control	-1	control	M	75	36m_191m	36m_191m	control	control	control	control	-1	-1
129	C109	Control	0	28	Control				30	720		Control																				12.5	C109_day_1	C109	188	control	control	0	control	F	28	12m_36m	24m_36m	control	control	control	control	-1	-1
130	C110	Control	0	54	Control				30	720		Control																				17.9	C110_day_1	C110	187	control	control	-1	control	F	54	36m_191m	36m_191m	control	control	control	control	-1	-1
131	C120	Control	0	54	Control				30	720		Control	1.69E+05	1.57E+06	2.97E+05	3.64E+06	1.74E+06	1.79E+07	5.29E+06	4.19E+06	1.11E+07	8.11E+04	1.78E+08	2.12E+05	5.35E+05	1.58E+06	3.38E+08	5.04E+08	7.19E+04	1.90E+05	5.72E+06	17.6	C120_day_1	C120	152	control	control	0	control	M	50	36m_191m	36m_191m	control	control	control	control	-1	-1
132	C121	Control	0	26	Control				30	720		Control	1.12E+05	2.63E+05	1.08E+05	8.07E+05	1.38E+06	3.43E+07	5.25E+06	7.97E+05	7.21E+06	4.07E+05	1.21E+07	4.64E+05	5.09E+05	5.33E+06	3.81E+08	1.18E+07	1.92E+04	1.94E+05	1.52E+06
[truncated: 165 more columns]
